# Supplementary material for: Serial monogamy benefits both sexes in the biparental convict cichlid
Source: PeerJ. 2019 Mar 5;7:e6535. doi: 10.7717/peerj.6535 (PMC6407500; doi:10.7717/peerj.6535)
Supplement: Supplemental Information 1 — All data used in analysis for all males and females during their two breeding bouts are included. Behaviors, egg counts, and days to spawning are all included. [file peerj-07-6535-s001.xlsx]

## Sheet: Behavioral Data
	Male Retrievals		Female Retrievals		Male Time in Nest (proprtion)		Female Time in Nest (proportion)		Male Time Intruder (proportion)		Female Time Intruder (proportion)		Male Aggressive Behaviors		Female Aggressive Behaviors		Male Aggressive Behaviors (rate)		Female Aggressive Behaviors (rate)					Experimental	Total Time Collecting		% Time Divided		% Time Together Intruder
Experimental Group	Bout 1	Bout 2	Bout 1	Bout 2	Bout 1	Bout 2	Bout 1	Bout 2	Bout 1	Bout 2	Bout 1	Bout 2	Bout 1	Bout 2	Bout 1	Bout 2	Bout 1	Bout 2	Bout 1	Bout 2				Group	Bout 1	Bout 2	Bout 1	Bout 2	Bout 1	Bout 2
Same	0	7	69	46	0	0	33.5	26.7	64.2	41.6	17.8	0	138	35	44	0	29.0526	25.7353	9.26316	0				same	475	136	16.6	16.6	13.9	0
Same	10	10	47	51	1.7	6.1	21.1	13.6	58.5	57.5	40.2	43.6	112	509	87	403	27.6543	25.4627	21.4815	20.1601				same	405	1999	6.6	11.5	38	38.9
Same	51	6	0	43	0	0	0	18.9	3.6	3.8	0	4.4	9	7	0	7	1.38037	1.93906	0	1.93906				same	652	361	3.6	0	0	0
Same	1	0	42	23	21.3	6.1	34.7	14	31.8	76.9	5.7	50.6	88	213	16	147	16	31.3697	2.90909	21.6495				same	550	679	8.4	5.35	0	50.6
Same	1	0	31	39	3.7	0	62.2	61.2	7.6	0	6.9	0	34	0	1	0	2.53542	0	0.0745712	0				same	1341	538	7.1	0	0	0
Same	0	13	32	22	41.7	12.1	15.2	29.5	29.4	30.9	3.2	1.8	87	67	6	5	16.6987	16.0671	1.15163	1.19904				same	521	417	7.8	19.6	2.1	1.8
Same	2	0	40	41	12.2	0	14.1	11.6	50	85.7	27.7	29.5	182	408	108	141	20.3125	38.673	12.0536	13.3649				same	896	1055	10	34.5	23	27.9
Same	8	18	41	20	0	5.9	25	10.1	68.9	45.2	55.5	42.9	586	118	538	108	34.6541	25.9912	31.8155	23.7885				same	1691	454	9	4.8	53.7	36.8
Same	10	12	32	0	20.4	0.3	54.7	19.4	50.1	78.1	13.9	34.5	63	587	20	309	18	34.3275	5.71429	18.0702				same	350	1710	34.7	29	11.8	34.3
Mean	9.22222	7.33333	37.1111	31.6667	11.2222	3.38889	28.9444	22.7778	40.4556	46.6333	18.9889	23.0333	144.333	216	91.1111	124.444	18.4764	22.174	9.38481	11.1301				Mean	764.556	816.556	11.5333	13.4833	15.8333	21.1444
SD	16.2233	6.5	18.1276	16.4165	14.3209	4.36419	19.8346	15.8518	23.7633	31.2946	18.7709	21.2427	173.615	227.834	171.972	146.518	11.2755	13.606	10.9233	10.2253				SD	462.448	643.386	9.3663	12.4433	19.1615	20.5005
SEM	5.40776	2.16667	6.04254	5.47215	4.77365	1.45473	6.61155	5.28393	7.92111	10.4315	6.25696	7.0809	57.8717	75.9446	57.324	48.8393	3.75849	4.53533	3.6411	3.40843				SEM	154.149	214.462	3.1221	4.14776	6.38716	6.8335
New	5	6	19	36	4.2	0.3	14	5.9	32.9	64.9	39.2	44.2	69	457	276	338	15.9722	37.1243	19.5884	27.4574				male	432	1231	27.4	7.6	0	43.5
New	54	27	7	44	6.9	5	6.4	20.6	23.6	25.9	49.4	17.2	89	45	257	29	13.1268	10.2506	23.578	6.60592				male	678	439	14.7	9.8	7.2	12
New	13	0	44	36	14.3	0	33	29	6.6	38.1	13.9	26.9	29	64	69	46	3.0083	19.6319	5.71665	14.1104				male	964	326	1.7	2.9	2	25.6
New	0	0	21	36	2.4	0	35.3	11.7	85.3	85.6	3.6	66	830	369	12	282	37.6247	37.6531	1.24481	28.7755				male	2206	980	29.9	15.4	40.4	61
New	8	5	36	52	2.2	0.8	17	25.2	11.8	42.8	41.8	17.9	57	84	510	39	4.71854	15.7303	23.1188	7.30337				male	1208	534	0.3	18.5	11	14
New	12	0	25	33	0.5	0.2	40.2	60.6	44.3	69.6	24.3	0.3	82	310	173	2	9.82036	21.8156	11.1757	0.140746				male	835	1421	36.9	64.6	3.2	0.3
New	0	37	20	0	0.9	1.5	41.5	14.6	63.5	60.3	4.6	52.3	363	465	16	422	23.4345	25.7903	1.91847	23.4054				male	1549	1803	32	7.4	21.7	45.5
New	6	54	30	0	0.9	6.9	45	73	71.3	2.7	1.3	0	582	14	3	0	37.0701	2.5878	0.561798	0				male	1570	541	1	2.7	69.1	0
New	0	3	24	45	4.5	14.9	15.6	43.6	0	62	0.9	3	0	96	2	10	0	21.7195	0.470588	2.26244				male	534	442	0	43.2	0	0
Mean	10.8889	14.6667	25.1111	31.3333	4.08889	3.28889	27.5556	31.5778	37.7	50.2111	19.8889	25.3111	233.444	211.556	146.444	129.778	16.0862	21.367	9.70813	12.229				Mean	1108.44	857.444	15.9889	19.1222	17.1778	22.4333
SD	16.9074	19.8368	10.6589	18.7283	4.35874	5.00361	14.2913	22.9488	30.3831	25.3347	19.3147	24.0521	294.199	186.119	174.791	167.651	13.9878	11.426	9.93238	11.646				SD	579.886	524.537	15.6111	21.0717	23.4767	22.7752
SEM	5.63581	6.61228	3.55295	6.24277	1.45291	1.66787	4.76376	7.6496	10.1277	8.44489	6.43822	8.01735	98.0662	62.0397	58.2636	55.8835	4.66261	3.80868	3.31079	3.88199				SEM	193.295	174.846	5.2037	7.0239	7.82558	7.59172
																								female	1409	1231	12.7	7.6	32.1	43.5
																								female	1090	439	2	9.8	45.8	12
																								female	1207	326	0.4	2.9	11	25.6
																								female	964	980	1.7	15.4	2	61
																								female	2206	534	29.9	18.5	40.4	14
																								female	1548	1421	32	64.6	21.7	0.3
																								female	834	1803	36.9	7.4	3.2	45.5
																								female	534	541	0	2.7	0	0
																								female	425	442	0.6	43.2	0	0
																								Mean	1135.22	857.444	12.9111	19.1222	17.3556	22.4333
																								SD	546.013	524.537	15.6047	21.0717	18.2188	22.7752
																								SEM	182.004	174.846	5.20156	7.0239	6.07294	7.59172

## Sheet: Egg Counts and Days to Spawn
	BOUT 1			BOUT 2							BOUT 1							BOUT 2
	Tank	Days to Spawn	Eggs	Tank	Days to Spawn	Eggs	Spawn Difference	Eggs Difference			Male Tank	Female Tank	Days to Spawn Male	Days to Spawn Female	Eggs Male	Eggs Female		Tank	Days to Spawn	Eggs		Male Spawn Difference	Female Spawn Difference	Male Egg Difference	Female Egg Difference
	Tank 21 081122&24	6	102	Tank 24 081212-14	12	173	6	71			Tank 7 080907-09	Tank 8 080905-07	25	22	107	121		Tank 9 080930-1002	14	162		-11	-8	55	41
	Tank 10 081128	10	143	Tank 21 081214-15	10	147	0	4			Tank 3 081014-16	Tank 23 081014-16	13	15	112	170		Tank 21 081105-06	16	196		3	1	84	26
	Tank 20 081106-08	28	166	Tank 7 081226&28	42	174	14	8			Tank 16 090803	Tank 22 090803	15	18	98	215		Tank 18 090819-20	10	247		-5	-8	149	32
	Tank 24 081121-23	17	171	Tank 19 081224&26	27	105	10	-66			Tank 23 090730	Tank 16 090803	18	15	120	98		Tank 5 090901	22	102		4	7	-18	4
	Tank 24 090202-03	18	133	Tank 8 090306-07	21	177	3	44			Tank 22 090803	Tank 23 090730	18	18	215	120		Tank 2 090904	26	174		8	8	-41	54
	Tank 2 090209-10	6	197	Tank10 090225-27	10	225	4	28			Tank 5 090911	Tank 7 090911	4	21	125	204		Tank 8 090930&1002	11	149		7	-10	24	-55
	Tank 9 090513-14	5	76	Tank 14 090607-08	17	142	12	66			Tank 7 090911	Tank 5 090911	21	4	204	125		Tank 6 090930	10	105		-11	6	-99	-20
	Tank 4 090721	4	110	Tank 6 090807	9	206	5	96			Tank 5 091002-03	Tank 7 091005	11	13	138	122		Tank 6 091021-22	12	189		1	-1	51	67
	Tank 5 090118	4	100	Tank 23 090202-03	9	117	5	17			Tank 7 091005	Tank 9 091002	13	31	122	105		Tank 23 091027-28	17	335		4	-14	213	230
		10.8889	133.111		17.4444	162.889	6.55556	29.7778					15.3333	17.4444	137.889	142.222			15.3333	184.333		0	-2.11111	46.4444	42.1111
		8.3583	39.6183		11.1255	39.1901	4.53076	47.5362					6.10328	7.33333	42.2358	43.1213			5.59017	72.208		7.26292	8.17686	95.6688	79.9741
		2.7861	13.2061		3.70852	13.0634	1.51025	15.8454					2.03443	2.44444	14.0786	14.3738			1.86339	24.0693		2.42097	2.72562	31.8896	26.658
